# Supplementary material for: Modulation of oculomotor control during reading of mirrored and inverted texts
Source: PubMed Central journal article supplement (PMC7060224; doi:10.1038/s41598-020-60833-6), 2020-03-06
Supplement: 41598_2020_60833_MOESM1_ESM.pdf [file 41598_2020_60833_MOESM1_ESM.pdf]

# Supplementary Information to: Modulation of oculomotor control during reading of mirrored and inverted texts

Johan Chandra\*, André Krügel, and Ralf Engbert

University of Potsdam, Germany

December 19, 2019

\*To whom correspondence should be addressed:

Johan Chandra

Department of Psychology & Cognitive Science Program

University of Potsdam

Am Neuen Palais 10

14469 Potsdam

Germany

E-mail: [johan.chandra@uni-potsdam.de](mailto:johan.chandra@uni-potsdam.de)

Phone: +49 331 977-2184, Fax: +49 331 977-2794

# 1 Method

## 1.1 Global summary statistics

Statistics of fixation durations and saccade lengths of all valid fixations were computed for a global summary analysis. Words are categorised based on their length (WLC): short ( $\leq 4$  characters), medium (5-7 characters), and long ( $\geq 8$  characters) for further statistical analysis.

*Fixation durations.* One way to quantify the visual information processing in reading is to examine the time spent on fixating words (fixation duration). Single fixation duration (SFD) refers to the time spent on a word which received exactly one fixation. When a word received more than one fixations in first-pass reading, the duration of the first and second fixations generated the first of multiple fixations duration (FMD) and second of multiple fixation duration (SMD). Inspection of duration distributions suggested that log-transformation is required to meet assumptions of Linear-Mixed Model. Therefore, for word-length effect analysis, the fixation duration measures were transformed into their logarithmic values.

*Fixation probability.* Fixation probability on a word depends on different saccade types. For first-pass reading data, we computed the skipping, refixation and regression probabilities. Regression cases were counted for words whose saccade directions went against reading directions, right to left for control condition and vice versa for experimental conditions. For each word that is the target of skipping saccades and refixations and/or source of regression saccades, a logical value of 1 is assigned to the word. Otherwise, a logical value of 0 was assigned.

The coefficients of the fixed effect of word length classes and the random effect for various participants and sentences were estimated using the lme4 package (Bates et al., 2015). Each independent variable of fixation duration and fixation probability measure is modelled as a function of word length (WLC) across sessions (`sess`), with a fully parameterised variance-covariance matrix for participants expressed in the term of `pID`. Furthermore, the variance for the intercept over sentence number (expressed in the terms (`1|sID`)) are taken into account. The model also allows us to examine the interaction of word-length effect between the control and experimental sessions. For instance, the log-transformed duration of the first of multiple fixations(FMD) is modelled as

$$\text{lmer}(\log(\text{FMD}) = \text{WLC} * \text{sess} + (1 + \text{WLC} + \text{sess}|\text{pID}) + (1|\text{sID})), \quad (1)$$

Likewise, refixation probability (RFP) is modelled as

$$\text{glmer}(\text{RFP} = \text{WLC} * \text{sess} + (1 + \text{WLC} + \text{sess}|\text{pID}) + (1|\text{sID})), \quad (2)$$

Note that the models for fixation probabilities were estimated using general function of `glmer()` due to its ability to statistically analyse data with binary outcome. All models were estimated based on restricted maximum likelihood (REML).

## 1.2 Initial Landing Position

Within-word landing positions observed during reading are widely distributed and sometimes extend to the neighboring words. Observations of word-based landing positions in reading experiments are typically truncated at word boundaries (McConkie et al., 1988; Engbert & Nuthmann, 2008). To obtain estimations of the means and standard deviations of the landing-position distributions, truncated Gaussian curves for distributions of word-based fixation positions were fitted using Bayesian parameter inference (Kruschke, 2014) available in the package *rjags* (Plummer, 2016) in the R environment.

Only fixations from inter-word forward saccades were considered in the estimation procedure. For each session, fixation data were grouped based on word length (3-7 letters) and launch-site distance (-1 to -5 characters), resulting in three different word-length and launch-site session-specific data subsamples. For each data subset  $S_i$ , a two-dimensional posterior distribution was estimated over the parameters mean  $\mu$  and standard deviation  $\sigma$  of the underlying Gaussian landing-position distribution conforming to

$$p(\mu, 1/\sigma^2 | S_i) = \frac{p(S_i | \mu, 1/\sigma^2) p(\mu, 1/\sigma^2)}{\int \int p(S_i | \mu, 1/\sigma^2) p(\mu, 1/\sigma^2) d\mu d1/\sigma^2}. \quad (3)$$

Observations of fixation landing positions are assumed to be generated by a normal-density likelihood function  $p(S_i | \mu, 1/\sigma^2)$  with mean  $\mu$  and precision  $\tau = 1/\sigma^2$ . With  $p(\mu, 1/\sigma^2)$  we specified a normally distributed prior on the mean  $\mu$  with mean  $M$  and precision  $T$  and a prior on  $\tau$  distributed as a gamma density distribution with shape parameter  $A$  and rate  $B$  (see Kruschke (2014)). The parameters  $M, T$  (for the prior over  $\mu$ ) and  $A, B$  (for the prior  $\tau$ ) were derived as follows: For the control condition, distributions of landing positions for each word length and launch-site distance were independently fitted by a truncated Gaussian function and the parameters of these fits were used to estimate the parameters of the empirical prior distribution. The estimated parameters from the control condition were used to estimate landing position distributions for the first experimental session and the resulting parameters were used to systematically update the prior distribution for the second experimental session.

## 2 Tables & Figures

Table A1: Global summary statistics.

| Condition                  |             | Control | Mirrored Words (mW) |       |       | Mirrored Letters (mL) |       |       | Inverted Words (iW) |       |       | Scrambled Letters (sL) |       |       |
|----------------------------|-------------|---------|---------------------|-------|-------|-----------------------|-------|-------|---------------------|-------|-------|------------------------|-------|-------|
| Session                    |             | 0       | 1                   | 2     | 3     | 1                     | 2     | 3     | 1                   | 2     | 3     | 1                      | 2     | 3     |
| Detected fixations         | N           | 82487   | 21598               | 27500 | 26957 | 26677                 | 24205 | 22246 | 22531               | 24104 | 25728 | 25549                  | 26648 | 24062 |
| Discarded fixation         | N           | 40377   | 10351               | 12251 | 11691 | 12143                 | 11639 | 11271 | 10340               | 10766 | 10933 | 11361                  | 11350 | 10597 |
|                            | %           | 48.95   | 47.93               | 44.55 | 43.37 | 45.52                 | 48.09 | 50.67 | 45.89               | 44.66 | 42.49 | 44.47                  | 42.59 | 44.04 |
| Valid fixation             | N           | 42110   | 11247               | 15249 | 15266 | 14534                 | 12566 | 10975 | 12191               | 13338 | 14795 | 14188                  | 15298 | 13465 |
|                            | %           | 51.05   | 52.07               | 55.45 | 56.63 | 54.48                 | 51.91 | 49.33 | 54.11               | 55.34 | 57.51 | 55.53                  | 57.41 | 55.96 |
| First-pass fixation        | N           | 32343   | 6925                | 11166 | 11620 | 11200                 | 10061 | 8809  | 9479                | 10428 | 11912 | 10269                  | 10034 | 8836  |
|                            | %           | 76.81   | 61.57               | 73.22 | 76.12 | 77.06                 | 80.07 | 80.26 | 77.75               | 78.18 | 80.51 | 72.38                  | 65.59 | 65.62 |
| Forward saccades           | N           | 14956   | 2960                | 5386  | 5725  | 5636                  | 4379  | 3909  | 4050                | 4653  | 5363  | 4887                   | 4219  | 3843  |
|                            | %           | 46.24   | 42.74               | 48.24 | 49.27 | 50.32                 | 43.52 | 44.38 | 42.73               | 44.62 | 45.02 | 47.59                  | 42.05 | 43.49 |
| Skipping saccades          | N           | 9963    | 516                 | 834   | 931   | 1476                  | 2193  | 1964  | 431                 | 674   | 774   | 1973                   | 1999  | 1807  |
|                            | %           | 30.8    | 7.45                | 7.47  | 8.01  | 13.18                 | 21.8  | 22.3  | 4.55                | 6.46  | 6.5   | 19.21                  | 19.92 | 20.45 |
| Refixations                | N           | 7357    | 3436                | 4933  | 4957  | 4082                  | 3486  | 2930  | 4989                | 5096  | 5772  | 3400                   | 3805  | 3170  |
|                            | %           | 22.75   | 49.62               | 44.18 | 42.66 | 36.45                 | 34.65 | 33.26 | 52.63               | 48.87 | 48.46 | 33.11                  | 37.92 | 35.88 |
| Regressions                | N           | 3692    | 693                 | 808   | 854   | 734                   | 695   | 638   | 549                 | 584   | 649   | 992                    | 985   | 966   |
|                            | %           | 11.42   | 10.01               | 7.24  | 7.35  | 6.55                  | 6.91  | 7.24  | 5.79                | 5.6   | 5.45  | 9.66                   | 9.82  | 10.93 |
| fixation duration          | mean [ms]   | 245     | 354                 | 351   | 337   | 299                   | 277   | 266   | 383                 | 344   | 329   | 306                    | 300   | 304   |
| forward saccade amplitude  | mean [char] | 7.82    | 5.19                | 5.58  | 5.81  | 5.53                  | 6.56  | 6.86  | 5.25                | 5.55  | 5.81  | 6.18                   | 6.15  | 6.38  |
| backward saccade amplitude | mean [char] | 4.23    | 2.82                | 2.97  | 3.03  | 3.01                  | 2.88  | 2.67  | 2.63                | 2.57  | 2.79  | 4.66                   | 3.95  | 4.25  |

Table A2: Results from Linear Mixed-Effects: Single Fixation Duration

| Condition              |               | <i>b</i> | <i>SE</i> | <i>t value</i> |
|------------------------|---------------|----------|-----------|----------------|
| Mirrored Letters (mL)  | Intercept     | 5.47     | 0.04      | 124.53         |
|                        | WLC           | 0.02     | 0.02      | <b>1.15</b>    |
|                        | Session 1     | 0.18     | 0.02      | 9.69           |
|                        | Session 2     | 0.10     | 0.02      | 5.32           |
|                        | Session 3     | 0.09     | 0.02      | 4.22           |
|                        | WLC:Session 1 | 0.06     | 0.01      | 7.79           |
|                        | WLC:Session 2 | 0.07     | 0.01      | 9.38           |
|                        | WLC:Session 3 | 0.06     | 0.01      | 8.30           |
| Mirrored Words (mW)    | Intercept     | 5.44     | 0.04      | 142.66         |
|                        | WLC           | 0.02     | 0.02      | <b>0.87</b>    |
|                        | Session 1     | 0.31     | 0.07      | 4.54           |
|                        | Session 2     | 0.31     | 0.06      | 5.11           |
|                        | Session 3     | 0.29     | 0.06      | 5.10           |
|                        | WLC:Session 1 | -0.14    | 0.01      | -12.13         |
|                        | WLC:Session 2 | -0.07    | 0.01      | -7.08          |
|                        | WLC:Session 3 | -0.01    | 0.01      | <b>-0.99</b>   |
| Inverted Words (iW)    | Intercept     | 5.48     | 0.04      | 128.67         |
|                        | WLC           | 0.01     | 0.02      | <b>0.45</b>    |
|                        | Session 1     | 0.36     | 0.05      | 7.48           |
|                        | Session 2     | 0.27     | 0.03      | 7.84           |
|                        | Session 3     | 0.22     | 0.03      | 6.17           |
|                        | WLC:Session 1 | -0.21    | 0.01      | -18.10         |
|                        | WLC:Session 2 | -0.10    | 0.01      | -9.56          |
|                        | WLC:Session 3 | -0.06    | 0.01      | -5.71          |
| Scrambled Letters (sL) | Intercept     | 5.46     | 0.03      | 186.58         |
|                        | WLC           | 0.01     | 0.02      | <b>0.24</b>    |
|                        | Session 1     | 0.11     | 0.04      | 2.91           |
|                        | Session 2     | 0.11     | 0.05      | 2.21           |
|                        | Session 3     | 0.10     | 0.04      | 2.34           |
|                        | WLC:Session 1 | 0.10     | 0.01      | 11.95          |
|                        | WLC:Session 2 | 0.12     | 0.01      | 14.61          |
|                        | WLC:Session 3 | 0.09     | 0.01      | 10.80          |

Note: Fixation duration value is log-transformed. WLC = word length. Non-significant values are marked in bold.

Table A3: Results from Linear Mixed-Effects model: Duration of First of Multiple Fixations

| Conditions             |               | <i>b</i> | <i>SE</i> | <i>t value</i> |
|------------------------|---------------|----------|-----------|----------------|
| Mirrored Letters (mL)  | Intercept     | 5.43     | 0.05      | 114.86         |
|                        | WLC           | -0.01    | 0.02      | <b>-0.31</b>   |
|                        | Session 1     | 0.16     | 0.03      | 4.56           |
|                        | Session 2     | 0.04     | 0.03      | <b>1.23</b>    |
|                        | Session 3     | 0.03     | 0.03      | <b>0.93</b>    |
|                        | WLC:Session 1 | 0.09     | 0.01      | 6.04           |
|                        | WLC:Session 2 | 0.09     | 0.02      | 5.86           |
|                        | WLC:Session 3 | 0.08     | 0.02      | 4.68           |
| Mirrored Words (mW)    | Intercept     | 5.37     | 0.05      | 101.59         |
|                        | WLC           | 0.04     | 0.03      | <b>1.56</b>    |
|                        | Session 1     | 0.34     | 0.04      | 9.23           |
|                        | Session 2     | 0.32     | 0.03      | 10.98          |
|                        | Session 3     | 0.24     | 0.05      | 4.36           |
|                        | WLC:Session 1 | -0.16    | 0.02      | -10.31         |
|                        | WLC:Session 2 | -0.20    | 0.01      | -14.05         |
|                        | WLC:Session 3 | -0.10    | 0.01      | -6.60          |
| Inverted Words (iW)    | Intercept     | 5.46     | 0.04      | 122.19         |
|                        | WLC           | 0.03     | 0.02      | <b>1.22</b>    |
|                        | Session 1     | 0.33     | 0.05      | 6.32           |
|                        | Session 2     | 0.25     | 0.05      | 4.83           |
|                        | Session 3     | 0.20     | 0.05      | 4.14           |
|                        | WLC:Session 1 | -0.16    | 0.02      | -10.58         |
|                        | WLC:Session 2 | -0.14    | 0.02      | -9.11          |
|                        | WLC:Session 3 | -0.11    | 0.02      | -7.32          |
| Scrambled Letters (sL) | Intercept     | 5.44     | 0.03      | 162.02         |
|                        | WLC           | 0.01     | 0.02      | <b>0.27</b>    |
|                        | Session 1     | 0.06     | 0.04      | <b>1.54</b>    |
|                        | Session 2     | 0.06     | 0.03      | <b>1.84</b>    |
|                        | Session 3     | 0.06     | 0.03      | <b>1.77</b>    |
|                        | WLC:Session 1 | 0.15     | 0.02      | 8.80           |
|                        | WLC:Session 2 | 0.22     | 0.02      | 12.83          |
|                        | WLC:Session 3 | 0.15     | 0.02      | 8.52           |

Note: Fixation duration value is log-transformed. WLC = word length. Non-significant values are marked in bold.

Table A4: Results from Linear Mixed-Effects model: Refixation Probabilities

| Condition              |               | <i>b</i> | <i>SE</i> | <i>z value</i> | <i>Pr(&gt;—z—)</i> |
|------------------------|---------------|----------|-----------|----------------|--------------------|
| Mirrored Letters (mL)  | Intercept     | -1.63    | 0.12      | -13.75         | 0.000              |
|                        | WLC           | 1.15     | 0.09      | 12.52          | 0.000              |
|                        | Session 1     | 1.29     | 0.18      | 7.32           | 0.000              |
|                        | Session 2     | 0.76     | 0.14      | 5.53           | 0.000              |
|                        | Session 3     | 0.48     | 0.17      | 2.75           | 0.006              |
|                        | WLC:Session 1 | 0.37     | 0.05      | 6.86           | 0.000              |
|                        | WLC:Session 2 | 0.41     | 0.06      | 7.33           | 0.000              |
|                        | WLC:Session 3 | 0.38     | 0.06      | 6.48           | 0.000              |
| Mirrored Words (mW)    | Intercept     | -1.35    | 0.18      | -7.62          | 0.000              |
|                        | WLC           | 1.15     | 0.11      | 10.50          | 0.000              |
|                        | Session 1     | 1.39     | 0.23      | 6.15           | 0.000              |
|                        | Session 2     | 1.35     | 0.14      | 9.78           | 0.000              |
|                        | Session 3     | 1.19     | 0.21      | 5.71           | 0.000              |
|                        | WLC:Session 1 | 0.55     | 0.05      | 10.00          | 0.000              |
|                        | WLC:Session 2 | 0.64     | 0.05      | 12.98          | 0.000              |
|                        | WLC:Session 3 | 0.69     | 0.05      | 13.85          | 0.000              |
| Inverted Words (iW)    | Intercept     | -1.51    | 0.17      | -9.03          | 0.000              |
|                        | WLC           | 1.21     | 0.07      | 18.14          | 0.000              |
|                        | Session 1     | 1.87     | 0.15      | 12.49          | 0.000              |
|                        | Session 2     | 1.69     | 0.17      | 10.06          | 0.000              |
|                        | Session 3     | 1.65     | 0.17      | 9.98           | 0.000              |
|                        | WLC:Session 1 | 0.64     | 0.05      | 11.76          | 0.000              |
|                        | WLC:Session 2 | 0.52     | 0.05      | 9.96           | 0.000              |
|                        | WLC:Session 3 | 0.62     | 0.05      | 12.17          | 0.000              |
| Scrambled Letters (sL) | Intercept     | -1.51    | 0.15      | -9.73          | 0.000              |
|                        | WLC           | 1.46     | 0.10      | 13.95          | 0.000              |
|                        | Session 1     | 0.78     | 0.23      | 3.48           | 0.000              |
|                        | Session 2     | 0.57     | 0.20      | 2.90           | 0.004              |
|                        | Session 3     | 0.67     | 0.18      | 3.64           | 0.000              |
|                        | WLC:Session 1 | 0.32     | 0.05      | 5.92           | 0.000              |
|                        | WLC:Session 2 | 0.42     | 0.06      | 7.61           | 0.000              |
|                        | WLC:Session 3 | 0.31     | 0.06      | 5.52           | 0.000              |

Note: WLC = word length. Non-significant values are marked in bold.

Table A5: Results from Linear Mixed-Effects model: Effect sizes across manipulation types

| Measures                                   |           | <i>b</i> | <i>SE</i> | <i>z value</i> | <i>Pr(&gt; z )</i> |
|--------------------------------------------|-----------|----------|-----------|----------------|--------------------|
| Single Fixation Duration (SFD)             | Intercept | 5.65     | 0.03      | 213.36         |                    |
|                                            | WLC       | -0.03    | 0.01      | -3.57          |                    |
|                                            | mL        | 0.09     | 0.02      | 3.95           |                    |
|                                            | sL        | 0.01     | 0.02      | <b>0.46</b>    |                    |
|                                            | mW        | 0.05     | 0.01      | 3.90           |                    |
|                                            | iW        | 0.04     | 0.01      | 4.07           |                    |
|                                            | WLC:mL    | 0.03     | 0.00      | 6.97           |                    |
|                                            | WLC:sL    | 0.02     | 0.00      | 8.38           |                    |
|                                            | WLC:mW    | -0.05    | 0.00      | -19.63         |                    |
|                                            | WLC:iW    | -0.04    | 0.00      | -19.74         |                    |
| First of Multiple Fixations duration (FMF) | Intercept | 5.60     | 0.03      | 212.41         |                    |
|                                            | WLC       | 0.00     | 0.01      | <b>-0.29</b>   |                    |
|                                            | mL        | 0.08     | 0.02      | 4.08           |                    |
|                                            | sL        | -0.01    | 0.01      | <b>-0.42</b>   |                    |
|                                            | mW        | 0.06     | 0.01      | 5.47           |                    |
|                                            | iW        | 0.04     | 0.01      | 4.45           |                    |
|                                            | WLC:mL    | 0.04     | 0.01      | 5.82           |                    |
|                                            | WLC:sL    | 0.05     | 0.01      | 9.21           |                    |
|                                            | WLC:mW    | -0.06    | 0.00      | -17.12         |                    |
|                                            | WLC:iW    | -0.04    | 0.00      | -14.35         |                    |
| Refixation Probability (RFX)               | Intercept | -0.40    | 0.08      | -5.03          | 0.000              |
|                                            | WLC       | 1.59     | 0.04      | 36.17          | 0.000              |
|                                            | mL        | 0.62     | 0.08      | 7.33           | 0.000              |
|                                            | sL        | 0.04     | 0.06      | 0.66           | <b>0.506</b>       |
|                                            | mW        | 0.21     | 0.04      | 4.80           | 0.000              |
|                                            | iW        | 0.21     | 0.04      | 5.91           | 0.000              |
|                                            | WLC:mL    | 0.17     | 0.02      | 7.17           | 0.000              |
|                                            | WLC:sL    | 0.08     | 0.02      | 4.47           | 0.000              |
|                                            | WLC:mW    | 0.07     | 0.01      | 5.05           | 0.000              |
|                                            | WLC:iW    | 0.05     | 0.01      | 4.54           | 0.000              |

Note: LMM model with helmert contrast. SFD and FMD values are log-transformed (base 10).

WLC = word length. Non-significant values are marked in bold.



Table A6: Quadratic fit to initial landing position curve (two-fixation cases) for reading normal text: Estimates of parameters A, B and C

| Session | Word Length | Parameters | Estimate | Std. Error | z value | Pr(z) |
|---------|-------------|------------|----------|------------|---------|-------|
| 0       | 4           | A          | 0.051    | 0.020      | 2.466   | 0.013 |
|         | 4           | B          | 0.065    | 0.008      | 7.814   | 0.000 |
|         | 4           | C          | 2.528    | 0.101      | 24.916  | 0.000 |
|         | 5           | A          | 0.023    | 0.015      | 1.497   | 0.134 |
|         | 5           | B          | 0.040    | 0.004      | 9.139   | 0.000 |
|         | 5           | C          | 3.336    | 0.121      | 27.468  | 0.000 |
|         | 6           | A          | 0.019    | 0.012      | 1.516   | 0.130 |
|         | 6           | B          | 0.023    | 0.003      | 8.859   | 0.000 |
|         | 6           | C          | 4.21     | 0.168      | 25.043  | 0.000 |
|         | 7           | A          | -0.008   | 0.016      | -0.518  | 0.604 |
|         | 7           | B          | 0.018    | 0.003      | 7.115   | 0.000 |
|         | 7           | C          | 4.98     | 0.251      | 19.834  | 0.000 |

Table A7: Quadratic fit to initial landing position curve (two-fixation cases) for reading *mirrored-word* (*mW*) text: Estimates of parameters A, B and C

| Session | Word Length | Parameters | Estimate | Std. Error | z value  | Pr(z)  |       |
|---------|-------------|------------|----------|------------|----------|--------|-------|
| 1       | 4           | A          | 0.080    | 0.022      | 3.684    | 0.000  |       |
|         |             | B          | 0.048    | 0.009      | 5.309    | 0.000  |       |
|         |             | C          | 2.670    | 0.173      | 15.650   | 0.000  |       |
|         | 5           | A          | 0.144    | 0.027      | 5.288    | 0.000  |       |
|         |             | B          | 0.007    | 0.007      | 1.037    | 0.300  |       |
|         |             | C          | 2.787    | 0.757      | 3.684    | 0.000  |       |
|         | 6           | A          | 0.181    | 0.028      | 6.533    | 0.000  |       |
|         |             | B          | -0.009   | 0.005      | -1.680   | 0.093  |       |
|         |             | C          | 3.523    | 0.602      | 5.852    | 0.000  |       |
| 7       | A           | 0.173      | 0.019    | 9.009      | 0.000    |        |       |
|         | B           | -0.009     | 0.003    | -3.265     | 0.001    |        |       |
|         | C           | 3.267      | 0.314    | 10.392     | 0.000    |        |       |
| 2       | 4           | A          | 0.074    | 0.039      | 1.897    | 0.058  |       |
|         |             | B          | 0.019    | 0.010      | 1.9497   | 0.051  |       |
|         |             | C          | 4.152    | 1.145      | 3.627    | 0.000  |       |
|         | 5           | A          | 0.099    | 0.027      | 3.633    | 0.000  |       |
|         |             | B          | 0.012    | 0.008      | 1.518    | 0.129  |       |
|         |             | C          | 4.202    | 1.221      | 3.443    | 0.001  |       |
|         | 6           | A          | 0.056    | 0.086      | 0.650    | 0.516  |       |
|         |             | B          | 0.000    | 0.000      | 1.049    | 0.294  |       |
|         |             | C          | 17.788   | 0.000      | 38076.98 | 0.000  |       |
|         | 7           | A          | 0.166    | 0.025      | 6.692    | 0.000  |       |
|         |             | B          | -0.007   | 0.004      | -2.078   | 0.038  |       |
|         |             | C          | 3.057    | 0.526      | 5.806    | 0.000  |       |
|         | 3           | 4          | A        | 0.043      | 0.011    | 3.861  | 0.000 |
|         |             |            | B        | 0.063      | 0.005    | 13.502 | 0.000 |
|         |             |            | C        | 2.718      | 0.069    | 39.444 | 0.000 |
| 5       |             | A          | 0.0845   | 0.042      | 1.998    | 0.046  |       |
|         |             | B          | 0.011    | 0.009      | 1.119    | 0.263  |       |
|         |             | C          | 4.708    | 2.078      | 2.265    | 0.023  |       |
| 6       |             | A          | -0.008   | 0.076      | -0.101   | 0.919  |       |
|         |             | B          | 0.001    | 0.000      | 2.050    | 0.040  |       |
|         |             | C          | 17.752   | 0.001      | 23601.67 | 0.000  |       |
| 7       |             | A          | 0.176    | 0.028      | 6.275    | 0.000  |       |
|         |             | B          | -0.009   | 0.004      | -2.315   | 0.021  |       |
|         |             | C          | 3.101    | 0.465      | 6.666    | 0.000  |       |

Table A8: Quadratic fit to initial landing position curve (two-fixation cases) for reading *mirrored-letter (mL)* text: Estimates of parameters A, B and C

| Session | Word Length | Parameters | Estimate | Std. Error | z value | Pr(z)    |       |
|---------|-------------|------------|----------|------------|---------|----------|-------|
| 1       | 4           | A          | -0,007   | 0,022      | -0,314  | 0.753    |       |
|         |             | B          | 0,078    | 0,009      | 8,332   | 0.000    |       |
|         |             | C          | 2,802    | 0,120      | 23,424  | 0.000    |       |
|         |             | 5          | A        | 0,009      | 0,017   | 0,494    | 0.621 |
|         |             |            | B        | 0,038      | 0,005   | 7,626    | 0.000 |
|         |             |            | C        | 3,593      | 0,172   | 20,842   | 0.000 |
|         |             | 6          | A        | 0,028      | 0,006   | 4,569    | 0.000 |
|         |             |            | B        | 0,016      | 0,001   | 12,389   | 0.000 |
|         |             |            | C        | 4,800      | 0,161   | 29,770   | 0.000 |
|         | 7           | A          | 0,015    | 0,016      | 0,943   | 0.346    |       |
|         |             | B          | 0,007    | 0,002      | 4,283   | 0.000    |       |
|         |             | C          | 6,717    | 0,787      | 8,540   | 0.000    |       |
| 2       | 4           | A          | 0,002    | 0,004      | 0,446   | 0.656    |       |
|         |             | B          | 0,060    | 0,002      | 36,706  | 0.000    |       |
|         |             | C          | 3,150    | 0,035      | 89,4066 | 0.000    |       |
|         |             | 5          | A        | 1,316      | 0,331   | 3,974    | 0.000 |
|         |             |            | B        | -0,002     | 0,001   | -3,487   | 0.000 |
|         |             |            | C        | -20,033    | 0,018   | -1087,91 | 0.000 |
|         |             | 6          | A        | 0,002      | 0,019   | 0,095    | 0.924 |
|         |             |            | B        | 0,022      | 0,004   | 5,463    | 0.000 |
|         |             |            | C        | 4,544      | 0,324   | 14,023   | 0.000 |
|         |             | 7          | A        | 0,011      | 0,010   | 1,076    | 0.282 |
|         |             |            | B        | 0,010      | 0,002   | 6,450    | 0.000 |
|         |             |            | C        | 5,933      | 0,405   | 14,661   | 0.000 |
|         | 3           | 4          | A        | 0,041      | 0,023   | 1,838    | 0.066 |
|         |             |            | B        | 0,054      | 0,010   | 5,436    | 0.000 |
|         |             |            | C        | 2,980      | 0,211   | 14,152   | 0.000 |
|         |             | 5          | A        | 0,010      | 0,021   | 0,487    | 0.631 |
|         |             |            | B        | 0,037      | 0,006   | 6,021    | 0.000 |
|         |             |            | C        | 3,654      | 0,227   | 16,110   | 0.000 |
|         |             | 6          | A        | 0,002      | 0,020   | 0,080    | 0.936 |
|         |             |            | B        | 0,024      | 0,004   | 5,568    | 0.000 |
|         |             |            | C        | 4,363      | 0,290   | 15,042   | 0.000 |
|         |             | 7          | A        | -0,002     | 0,020   | -0,123   | 0.902 |
|         |             |            | B        | 0,017      | 0,003   | 5,455    | 0.000 |
|         |             |            | C        | 4,990      | 0,329   | 15,169   | 0.000 |

Table A9: Quadratic fit to initial landing position curve (two-fixation cases) for *reading inverted-word (iW)* text: Estimates of parameters A, B and C

| Session | Word Length | Parameters | Estimate | Std. Error | z value  | Pr(z) |
|---------|-------------|------------|----------|------------|----------|-------|
| 1       | 4           | A          | -0.460   | 0.116      | -3.976   | 0.000 |
|         | 4           | B          | 0.002    | 0.000      | 5.742    | 0.000 |
|         | 4           | C          | 22.504   | 0.004      | 5642.92  | 0.000 |
|         | 5           | A          | 0.213    | 0.022      | 9.688    | 0.000 |
|         | 5           | B          | -0.012   | 0.006      | -1.884   | 0.060 |
|         | 5           | C          | 1.510    | 0.653      | 2.312    | 0.021 |
|         | 6           | A          | 0.214    | 0.026      | 8.132    | 0.000 |
|         | 6           | B          | -0.018   | 0.005      | -3.570   | 0.000 |
|         | 6           | C          | 2.940    | 0.243      | 12.093   | 0.000 |
| 2       | 7           | A          | 0.197    | 0.023      | 8.550    | 0.000 |
|         | 7           | B          | -0.013   | 0.003      | -3.954   | 0.000 |
|         | 7           | C          | 3.064    | 0.276      | 11.102   | 0.000 |
|         | 4           | A          | 0.058    | 0.014      | 4.153    | 0.000 |
|         | 4           | B          | 0.030    | 0.005      | 5.758    | 0.000 |
|         | 4           | C          | 3.677    | 0.309      | 11.908   | 0.000 |
|         | 5           | A          | 0.006    | 0.054      | 0.115    | 0.909 |
|         | 5           | B          | 0.002    | 0.001      | 3.198    | 0.001 |
|         | 5           | C          | 11.017   | 0.001      | 11956.68 | 0.000 |
| 3       | 6           | A          | 0.042    | 0.116      | 0.361    | 0.718 |
|         | 6           | B          | 0.000    | 0.000      | 0.881    | 0.378 |
|         | 6           | C          | 24.665   | 0.001      | 41339.44 | 0.000 |
|         | 7           | A          | 0.167    | 0.025      | 6.785    | 0.000 |
|         | 7           | B          | -0.008   | 0.004      | -2.279   | 0.000 |
|         | 7           | C          | 3.522    | 0.439      | 8.024    | 0.000 |
|         | 4           | A          | 0.021    | 0.010      | 2.219    | 0.000 |
|         | 4           | B          | 0.053    | 0.004      | 12.494   | 0.000 |
|         | 4           | C          | 3.185    | 0.106      | 30.049   | 0.000 |
| 3       | 5           | A          | 0.080    | 0.029      | 2.767    | 0.006 |
|         | 5           | B          | 0.014    | 0.008      | 1.763    | 0.078 |
|         | 5           | C          | 4.295    | 1.099      | 3.908    | 0.000 |
|         | 6           | A          | 0.057    | 0.114      | 0.502    | 0.616 |
|         | 6           | B          | 0.000    | 0.000      | 0.767    | 0.443 |
|         | 6           | C          | 25.887   | 0.000      | 51952.32 | 0.000 |
|         | 7           | A          | 0.165    | 0.022      | 7.515    | 0.000 |
|         | 7           | B          | -0.008   | 0.003      | -2.388   | 0.017 |
|         | 7           | C          | 3.685    | 0.426      | 8.654    | 0.000 |

Table A10: Quadratic fit to initial landing position curve (two-fixation cases) for reading *scrambled-letter (sL)* text: Estimates of parameters A, B and C

| Session | Word Length | Parameters | Estimate | Std. Error | z value   | Pr(z)     |       |
|---------|-------------|------------|----------|------------|-----------|-----------|-------|
| 1       | 4           | A          | -0.034   | 0.034      | -1.020    | 0.301     |       |
|         |             | B          | 0.087    | 0.014      | 6.051     | 0.000     |       |
|         |             | C          | 2.833    | 0.169      | 16.776    | 0.000     |       |
|         |             | 5          | A        | 0.017      | 0.008     | 2.123     | 0.034 |
|         |             |            | B        | 0.031      | 0.0024    | 13.118    | 0.000 |
|         |             |            | C        | 3.861      | 0.118     | 32.791    | 0.000 |
|         |             | 6          | A        | 0.022      | 0.008     | 2.859     | 0.004 |
|         |             |            | B        | 0.019      | 0.002     | 11.561    | 0.000 |
|         |             |            | C        | 4.563      | 0.155     | 29.519    | 0.000 |
|         | 7           | A          | 0.620    | 0.043      | 14.332    | 0.000     |       |
|         |             | B          | 0.000    | 7.177      | -11.598   | 0.000     |       |
|         |             | C          | -20.736  | 0.001      | -19706.55 | 0.000     |       |
| 2       | 4           | A          | 0.002    | 0.026      | 0.081     | 0.935     |       |
|         |             | B          | 0.086    | 0.010      | 8.373     | 0.000     |       |
|         |             | C          | 2.538    | 0.095      | 26.578    | 0.000     |       |
|         |             | 5          | A        | -0.009     | 0.024     | -0.363    | 0.716 |
|         |             |            | B        | 0.042      | 0.007     | 6.196     | 0.000 |
|         |             |            | C        | 3.580      | 0.210     | 17.015    | 0.000 |
|         |             | 6          | A        | 0.021      | 0.015     | 1.348     | 0.178 |
|         |             |            | B        | 0.014      | 0.003     | 4.705     | 0.000 |
|         |             |            | C        | 5.149      | 0.492     | 10.456    | 0.000 |
|         |             | 7          | A        | 0.618      | 0.055     | 11.303    | 0.000 |
|         |             |            | B        | -0.001     | 0.000     | -9.141    | 0.000 |
|         |             |            | C        | -20.966    | 0.001     | -17086.51 | 0.000 |
|         | 3           | 4          | A        | 1.376      | 0.758     | 1.815     | 0.070 |
|         |             |            | B        | -0.002     | 0.001     | -1.553    | 0.121 |
|         |             |            | C        | -22.215    | 0.041     | -547.09   | 0.000 |
|         |             | 5          | A        | 0.025      | 0.009     | 2.778     | 0.005 |
|         |             |            | B        | 0.029      | 0.003     | 10.999    | 0.000 |
|         |             |            | C        | 3.918      | 0.145     | 27.020    | 0.000 |
|         |             | 6          | A        | 0.020      | 0.020     | 0.984     | 0.325 |
|         |             |            | B        | 0.015      | 0.004     | 3.698     | 0.000 |
|         |             |            | C        | 5.046      | 0.601     | 8.399     | 0.000 |
|         |             | 7          | A        | -0.027     | 0.011     | -2.442    | 0.015 |
|         |             |            | B        | 0.003      | 0.000     | 16.467    | 0.000 |
|         |             |            | C        | 10.061     | 0.000     | 49984.09  | 0.000 |

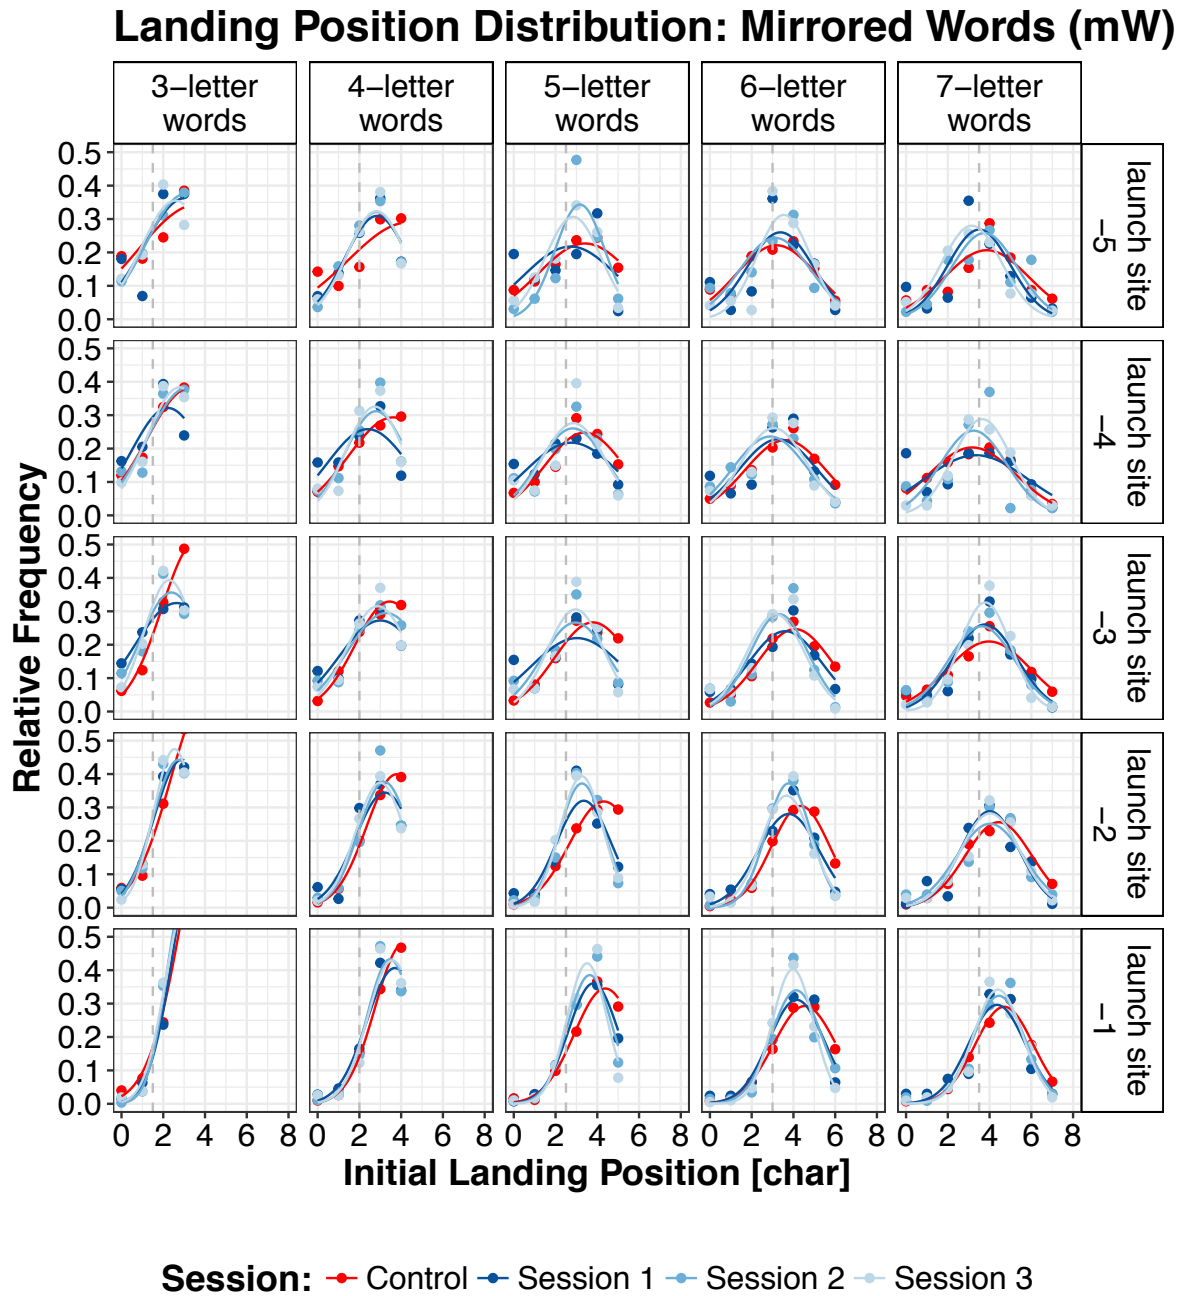

Figure F1: Within-word landing position distributions grouped by launch-site distance and word length for reading *mirrored-word* (*mW*) texts. Red line and dots represent data from normal reading session. Data from the first experimental session are presented in dark blue color. The lighter blue hues represent the last two experimental sessions.

## Landing Position Distribution: Mirrored Letters (mL)

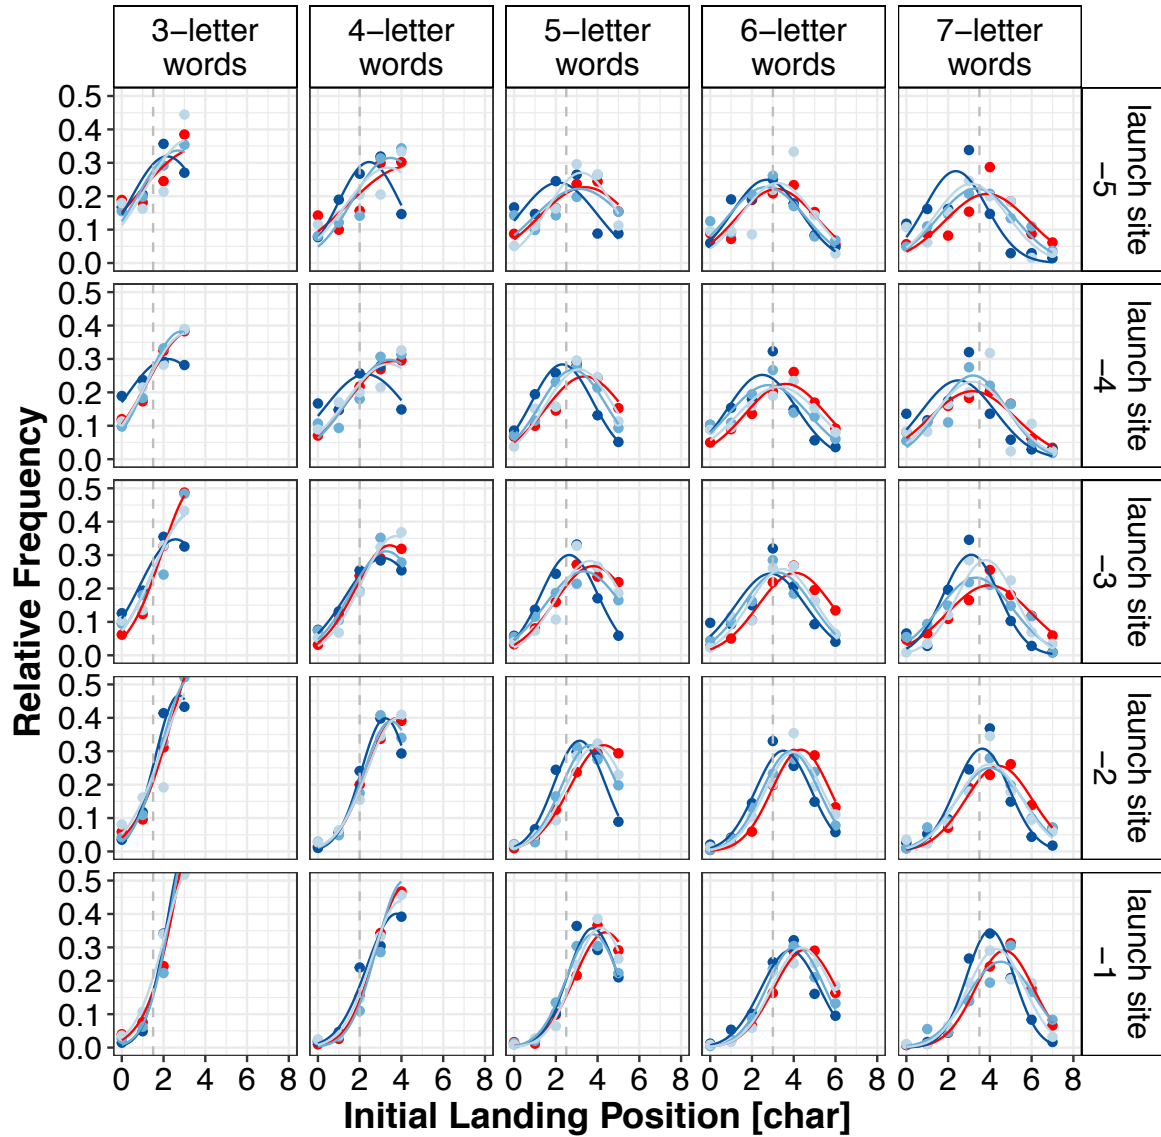

**Session:** —●— Control —●— Session 1 —●— Session 2 —●— Session 3

Figure F2: Within-word landing position distributions grouped by launch-site distance and word length for reading *mirrored-letter (mL)* texts. Red line and dots represent data from normal reading session. Data from the first experimental session are presented in dark blue color. The lighter blue hues represent the last two experimental sessions.

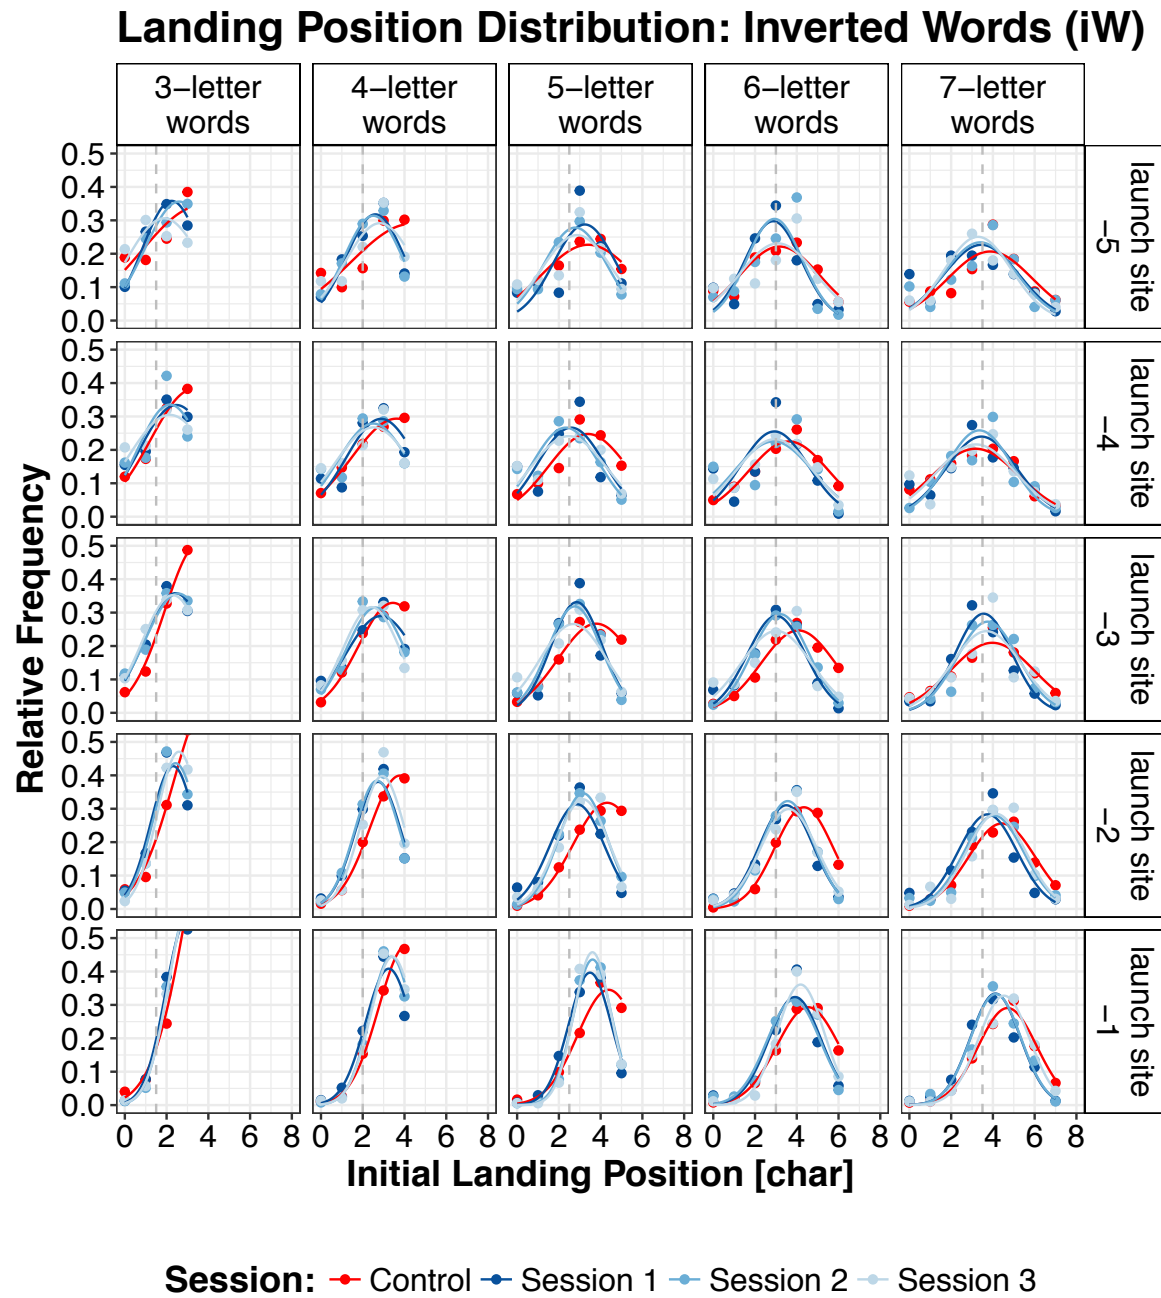

Figure F3: Within-word landing position distributions grouped by launch-site distance and word length for reading *inverted-word* (*iW*) texts. Red line and dots represent data from normal reading session. Data from the first experimental session are presented in dark blue color. The lighter blue hues represent the last two experimental sessions.



## Landing Position Distribution: Scrambled Letters (sL)

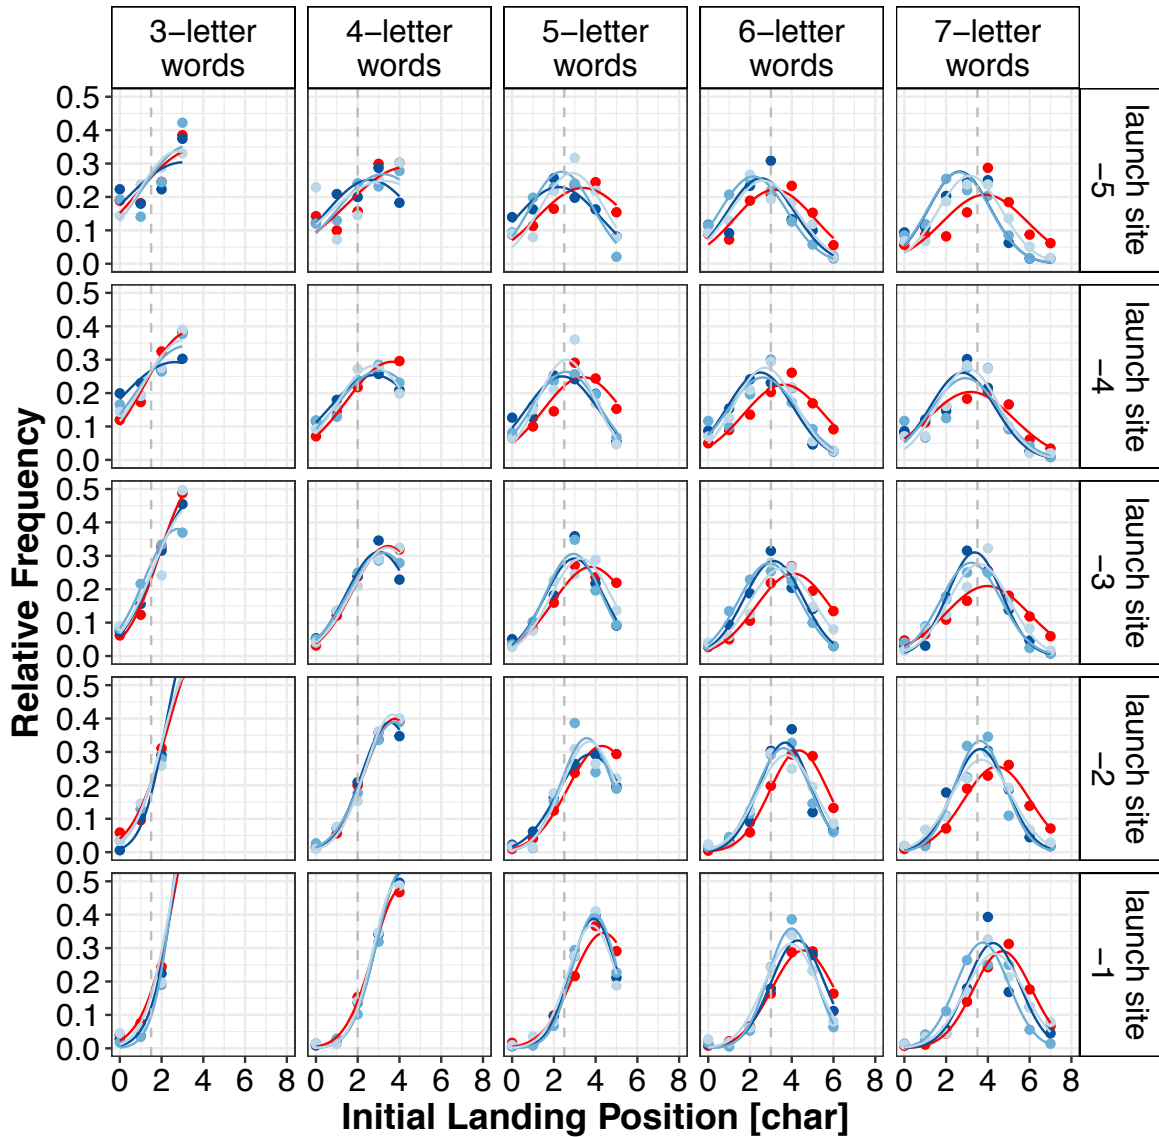

**Session:** —●— Control —●— Session 1 —●— Session 2 —●— Session 3

Figure F4: Within-word landing position distributions grouped by launch-site distance and word length for reading *scrambled-letter (sL)* texts. Red line and dots represent data from normal reading session. Data from the first experimental session are presented in dark blue color. The lighter blue hues represent the last two experimental sessions.

## References

- Bates, D., Mächler, M., Bolker, B., & Walker, S. (2015). Fitting linear mixed-effects models using lme4. *Journal of Statistical Software*, *67*(1), 1-48. doi: 10.18637/jss.v067.i01
- Engbert, R., & Nuthmann, A. (2008, 02). Self-consistent estimation of mislocated fixations during reading. *PLOS ONE*, *3*(2), 1-6. Retrieved from <https://doi.org/10.1371/journal.pone.0001534> doi: 10.1371/journal.pone.0001534
- Kruschke, J. K. (2014). *Doing bayesian data analysis: A tutorial with r, jags, and stan*. Academic Press.
- McConkie, G. W., Kerr, P. W., Reddix, M., & Zola, D. (1988). Eye movement control during reading: I. the localisation of initial eye fixations in words. *Visual Research*, *28*(10), 1107-1118. doi: [https://doi.org/10.1016/0042-6989\(88\)90137-X](https://doi.org/10.1016/0042-6989(88)90137-X)
- Plummer, M. (2016). rjags: Bayesian graphical models using mcmc [Computer software manual]. Retrieved from <https://CRAN.R-project.org/package=rjags> (R package version 4-6)
